# Supplementary material for: Social Media Release Increases Dissemination of Original Articles in the Clinical Pain Sciences
Source: PLoS One. 2013 Jul 17;8(7):e68914. doi: 10.1371/journal.pone.0068914 (PMC3714259; doi:10.1371/journal.pone.0068914)
Supplement: Table S1 — Example of Journals social media use as viewed 9 August 2012. (XLS) [file pone.0068914.s001.xls]

## Sheet: Sheet 1 - Table 1
	NEJM	BMJ	Nature
Facebook	1	32	4
Twitter	1	32	10
YouTube	1	1	1
Blog(s)	1	20	17
Podcasts	2	15	2
